# Supplementary material
Source: publisher site journal article supplement (https://www.dovepress.com/article/410954)
Supplement: Supplementary file 1 [file get_supplementary_file.php]

Supplemental Online Content

Supplemental Table1.Pulmonary embolism risk determination according to the Wells and Geneva score

| Characteristics | Low clinical probability,  n (%) | Moderate clinical probability, n (%) | High clinical probability, n (%) |
| --- | --- | --- | --- |
| Wells score | 85/1144 (7.4) | 153/398 (38.4%) | 28/38 (73.7) |
| Revised Geneva score | 57/491 (11.6) | 205/1081 (20.0%) | 4/8 (50.0) |

Supplemental Table 2. Clinical symptoms and signs at presentation

| Characteristics | All Subjects (n= 1580) | Non VTE  (n = 1193) | VTE  (n =387) | *P* |
| --- | --- | --- | --- | --- |
| Cough | 1459 (92.3) | 1120 (93.9) | 339 (87.6) | <0.001 |
| Purulent sputum | 1381 (87.4) | 1071 (89.8) | 316 (80.6) | <0.001 |
| Fever | 247 (15.6) | 197 (16.5) | 50 (12.9) | 0.089 |
| Wheeze | 1216 (77.0) | 922 (77.3) | 294 (76.0) | 0.587 |
| Chest distress | 827 (52.3) | 599 (50.2) | 228 (58.9) | 0.003 |
| Chest pain | 87 (5.5) | 55 (4.6) | 32 (8.3) | 0.006 |
| Hemoptysis | 57 (3.6) | 39 (3.3) | 18 (4.7) | 0.214 |
| Syncope | 29 (1.8) | 15 (1.3) | 14 (3.6) | 0.003 |
| Rhonchi | 634 (40.1) | 497 (41.7) | 137 (35.4) | 0.035 |
| Moist crackles | 652 (41.3) | 471 (39.5) | 181 (46.8) | 0.014 |
| Systolic blood pressure, mean (SD) | 133.8 (33.7) | 132.9(18.5) | 136.5 (59.0) | 0.073 |
| Diastolic blood pressure, mean (SD) | 77.8 (20.7) | 77.7 (22.9) | 78.1 (11.6) | 0.748 |
| Respiratory rat, mean (SD) | 20.7 (2.3) | 20.6 (2.1) | 21.0 (2.5) | 0.001 |
| Heart Rate, mean (SD) | 86.8 (15) | 86 (15.0) | 88 (16.0) | 0.114 |

**Abbreviation:** SD, standard deviation.

Supplemental Table 3. Admission blood tests

| Characteristics | All Subjects (n= 1580) | Non VTE (n= 1193) | VTE (n =266) | *P* |
| --- | --- | --- | --- | --- |
| PH, median (IQR) | 7.41 (0.06) | 7.41 (0.05) | 7.42 (0.06) | 0.029 |
| PaCO2, mean (SD), mmHg | 46.9 (13.3) | 47.2 (13.0) | 46.2 (14.1) | 0.237 |
| WBC, mean (SD), x109/L | 7.6 (3.6) | 7.7 (3.8) | 7.3 (2.8) | 0.069 |
| HB, mean, (SD), g/L | 135.8 (21.4) | 136.9 (21.0) | 132.6 (22.0) | 0.001 |
| PLT, mean (SD), x109/L | 215.4 (77.1) | 215.7 (75.2) | 214.2 (82.7) | 0.321 |
| PT, median (IQR), s | 12.2 (1.6) | 12.1 (1.5) | 12.5 (2.0） | <0.001 |
| APTT, median (IQR), s | 28.2 (6.5) | 27.7 (6.3) | 29.3 (7.3) | <0.001 |
| FBG, mean (SD), mg/L | 358.6 (145.3) | 366.8 (187.8) | 358.8 (134.5) | 0.743 |
| D-dimer, median (IQR), ng/mL | 498 (711.8) | 443 (518.8) | 750 (1306.5) | <0.001 |
| ALT, median (IQR), U/L | 17.0 (11.9) | 17.0 (11.0) | 17.0 (11.7) | 0.474 |
| AST, median (IQR), U/L | 19.0 (9.4) | 19.0 (9.0) | 1.90 (11.6) | 0.161 |
| Cr, mean, (SD), umol/L | 66.4 (21.9) | 65.5 (21.0) | 70.1 (23.5) | 0.960 |
| NT-proBNP/BNP |  |  |  |  |
| NT-proBNP, median (IQR), ng/L (1043) | 173.0 (384.5) | 142.2 (285.9) | 248.5 (1142.5) | <0.001 |
| BNP, median (IQR), ng/L (429) | 40.0 (73.0) | 37.0 (64.0) | 47.0 (119) | 0.033 |
| TC, mean (SD), mmol/L | 4.2 (1.1) | 4.3 (1.3) | 4.2 (1.6) | 0.368 |
| TG, mean (SD), mmol/L | 1.0 (0.6) | 1.0 (0.6) | 1.2 (0.6) | 0.639 |
| GLU, mean (SD), mmol/L | 5.6 (2.2) | 5.7 (2.3) | 5.8 (2.3) | 0.454 |

**Abbreviation:** PaCO2, arterial partial pressure of carbon dioxide; HCT, hematocrit; HB, hemoglobin; PLT, platelet; PT, prothrombin time; APTT, activated partial thromboplastin time; FBG, fibrinogen; ALT, alanine transaminase; AST, aspartate amino transferase; Cr, creatinine; NT-proBNP, N-terminal pro brain natriuretic peptide; BNP, brain natriuretic peptide; TC, cholesterol; TG, triglyceride; GLU, glucose; SD, standard deviation.
